# Supplementary material for: The Effect of Feedback on Resistance Training Performance and Adaptations: A Systematic Review and Meta-analysis
Source: PubMed Central journal article supplement (PMC10432365; doi:10.1007/s40279-023-01877-2), 2023-07-06
Supplement: 40279_2023_1877_MOESM3_ESM.pdf [file 40279_2023_1877_MOESM3_ESM.pdf]

| Study                     | Duration | Test                 | Unit | Control Group |        |       |        | Feedback Group |    |        |       | Estimate [95% CI] |       |                    |
|---------------------------|----------|----------------------|------|---------------|--------|-------|--------|----------------|----|--------|-------|-------------------|-------|--------------------|
|                           |          |                      |      | Pre           |        | Post  |        | Pre            |    | Post   |       |                   |       |                    |
|                           |          |                      |      | n             | M      | SD    | M      | SD             | n  | M      | SD    | M                 | SD    |                    |
| Nagata et al. 2020 [19]   | 4        | 30kg Squat Jump      | m/s  | 8             | 1.36   | 0.04  | 1.30   | 0.06           | 9  | 1.40   | 0.05  | 1.52              | 0.06  | 3.14 [ 1.68, 4.60] |
| Weakley et al. 2019 [22]  | 4        | Broad Jump           | cm   | 12            | 231.00 | 23.00 | 242.00 | 22.00          | 16 | 227.00 | 23.00 | 240.00            | 26.00 | 0.08 [-0.67, 0.83] |
| Weakley et al. 2019 [22]  | 4        | Countermovement Jump | cm   | 12            | 41.50  | 5.10  | 42.00  | 8.30           | 16 | 40.20  | 8.10  | 41.60             | 8.40  | 0.11 [-0.64, 0.86] |
| Randell et al. 2011 [20]  | 6        | Broad Jump           | cm   | 6             | 258.00 | 20.00 | 259.00 | 20.00          | 7  | 250.00 | 16.00 | 256.00            | 15.00 | 0.26 [-0.83, 1.36] |
| Vanderka et al. 2020 [21] | 6        | Countermovement Jump | cm   | 12            | 44.40  | 6.30  | 42.30  | 6.30           | 13 | 49.30  | 4.60  | 52.20             | 5.10  | 0.86 [ 0.04, 1.69] |
| Vanderka et al. 2020 [21] | 6        | Squat Jump           | cm   | 12            | 40.10  | 5.90  | 39.00  | 5.30           | 13 | 44.10  | 4.20  | 46.80             | 4.90  | 0.72 [-0.09, 1.53] |
| Randell et al. 2011 [20]  | 6        | Vertical Jump        | cm   | 6             | 66.00  | 6.00  | 67.00  | 1.00           | 7  | 61.00  | 6.00  | 64.00             | 7.00  | 0.30 [-0.79, 1.40] |

Model for All Outcomes

Heterogeneity:  $I^2$  (effect) = 0%,  $I^2$  (study) = 85.8%,  $I^2$  (total) = 85.8%

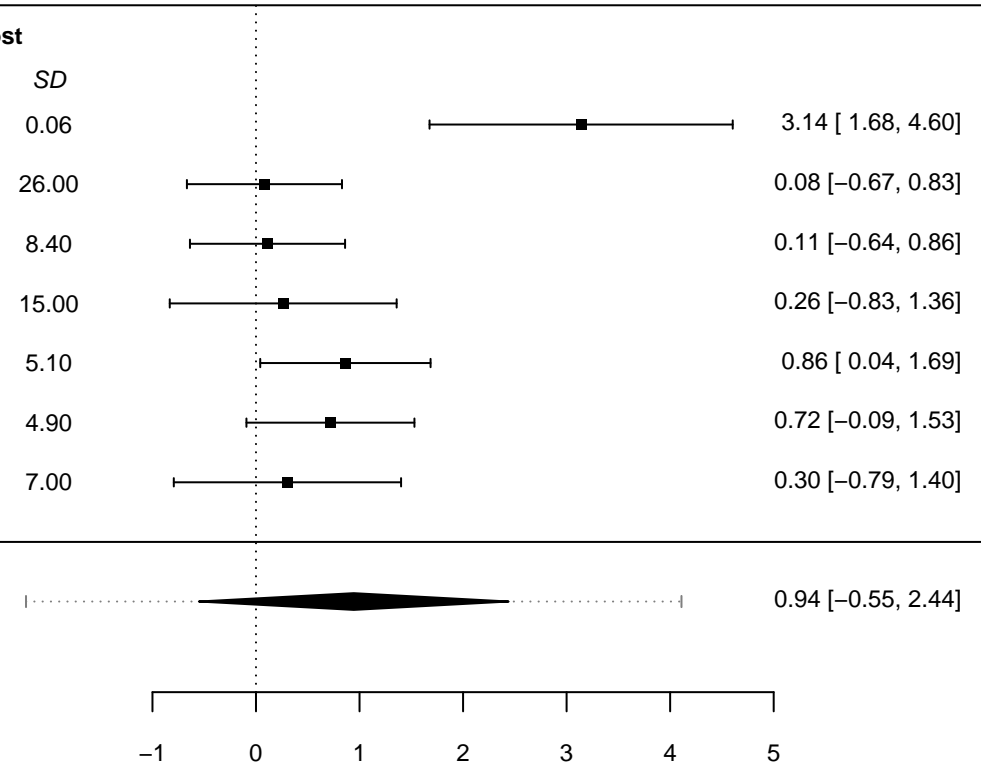

Positive values indicate greater pre to post improvement for feedback group
