# Supplementary material for: The Effect of Feedback on Resistance Training Performance and Adaptations: A Systematic Review and Meta-analysis
Source: PubMed Central journal article supplement (PMC10432365; doi:10.1007/s40279-023-01877-2), 2023-07-06

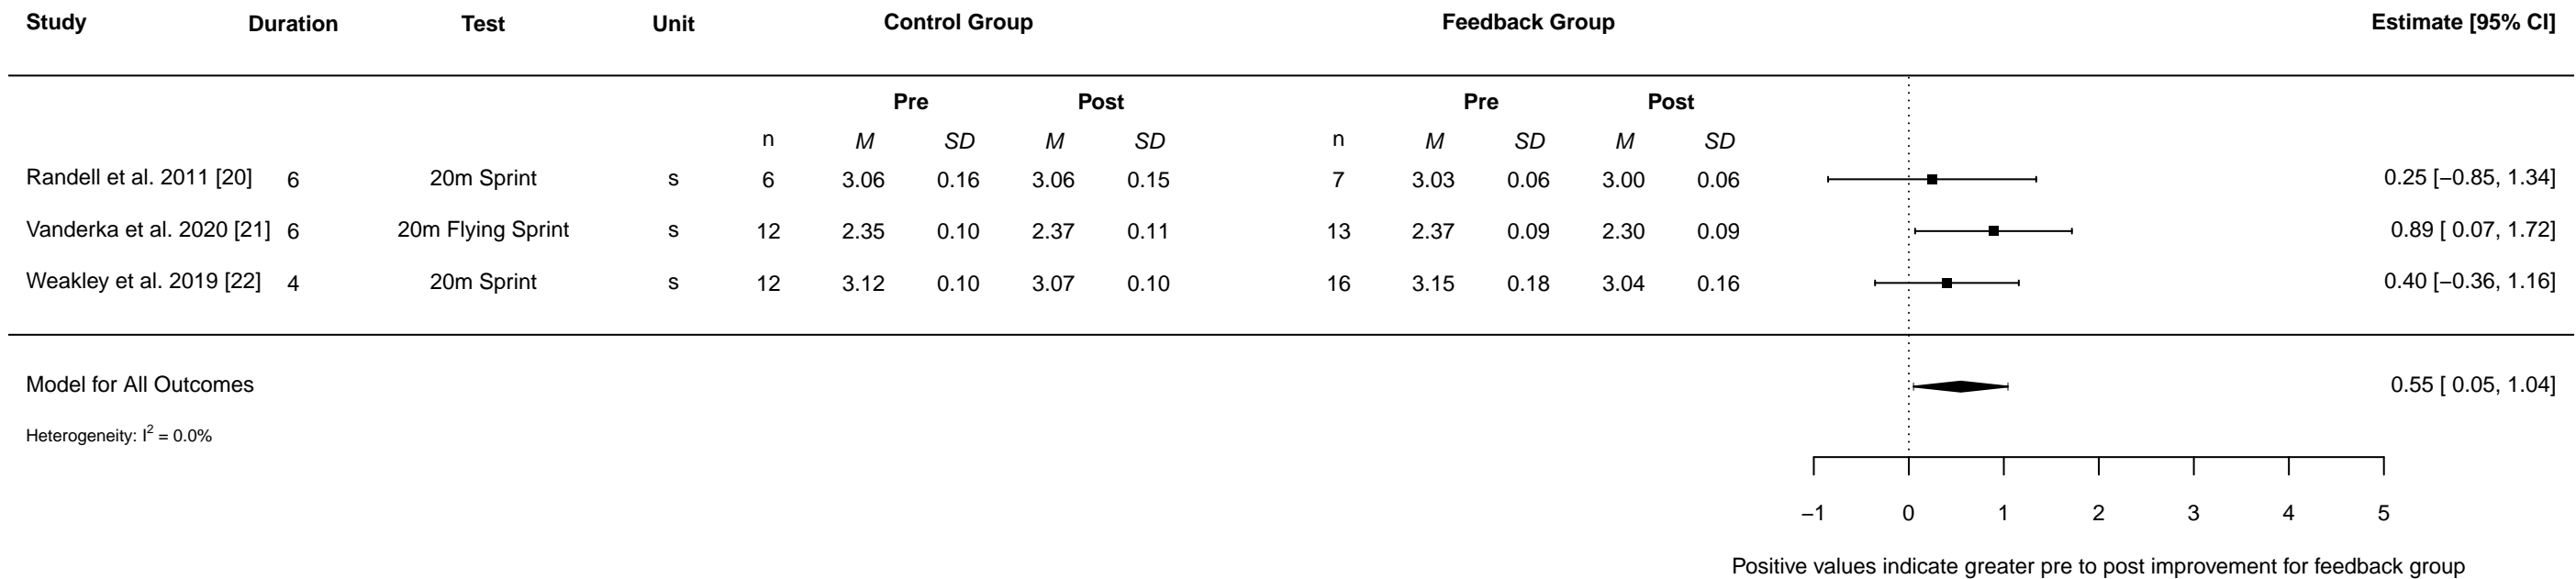

Supplement: 40279_2023_1877_MOESM4_ESM.pdf [file 40279_2023_1877_MOESM4_ESM.pdf]
